# Supplementary material for: Superior-capacity binder-free anode electrode for lithium-ion batteries: CoxMnyNizO nanosheets with metal/oxygen vacancies directly formed on Cu foil
Source: Royal Society of Chemistry journal article supplement (doi:10.1039/c8nr09706b), 2019-01-01
Supplement: c8nr09706b1.pdf [file c8nr09706b1.pdf]

## **Supporting Information:**

# **Superior-Capacity Binder-Free Anode Electrode for Lithium-ion Batteries: $\text{Co}_x\text{Mn}_y\text{Ni}_z\text{O}$ Nanosheets with Metal/Oxygen Vacancies Directly Forming on Cu Foil**

Qing Li<sup>a</sup>, Yuzhang Feng<sup>b</sup>, Peng Wang<sup>b</sup> and Renchao Che<sup>\*a</sup>

*<sup>a</sup>Laboratory of Advanced Materials, Department of Materials Science and Collaborative Innovation Center of Chemistry for Energy Materials, Fudan University, Shanghai 200438, P. R. China. E-mail: rcche@fudan.edu.cn.*

*<sup>b</sup>National Laboratory of Solid State Microstructures, College of Engineering and Applied Sciences, Collaborative Innovation Center of Advanced Microstructures and Center for the Microstructures of Quantum Materials, Nanjing University, Nanjing 210093, People ' s Republic of China.*

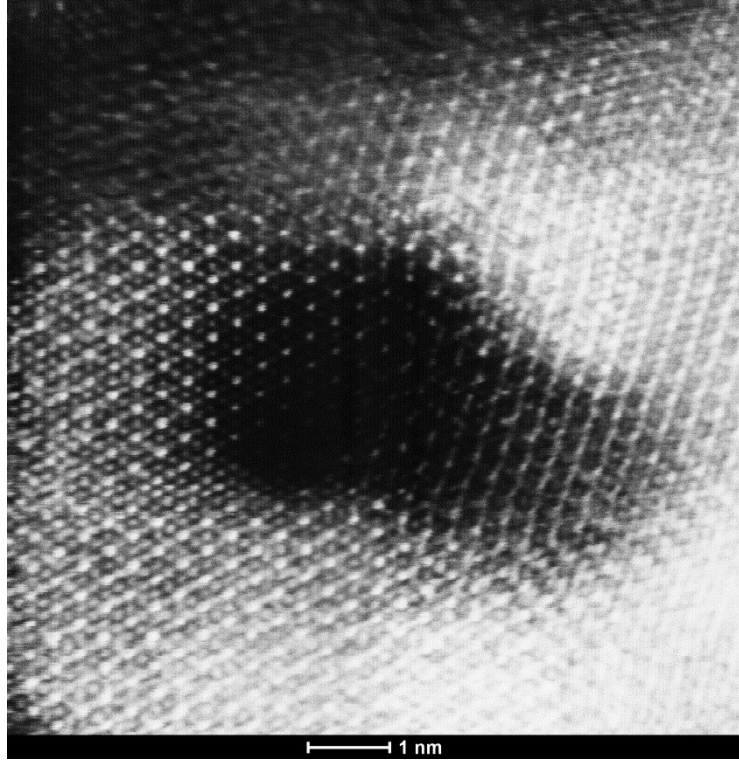

**Fig. S1.** STEM-HAADF image of CMN-CU.

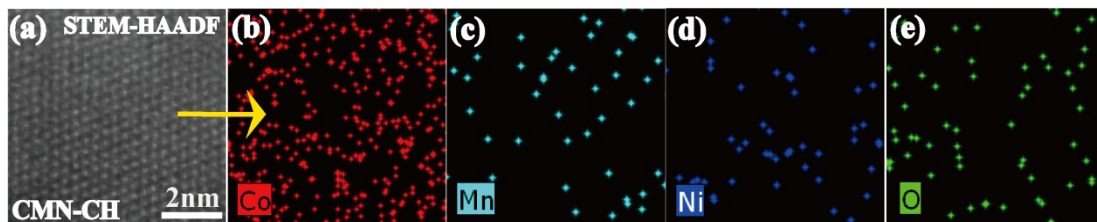

**Fig. S2.** Atomic mapping images of CMN-CU.

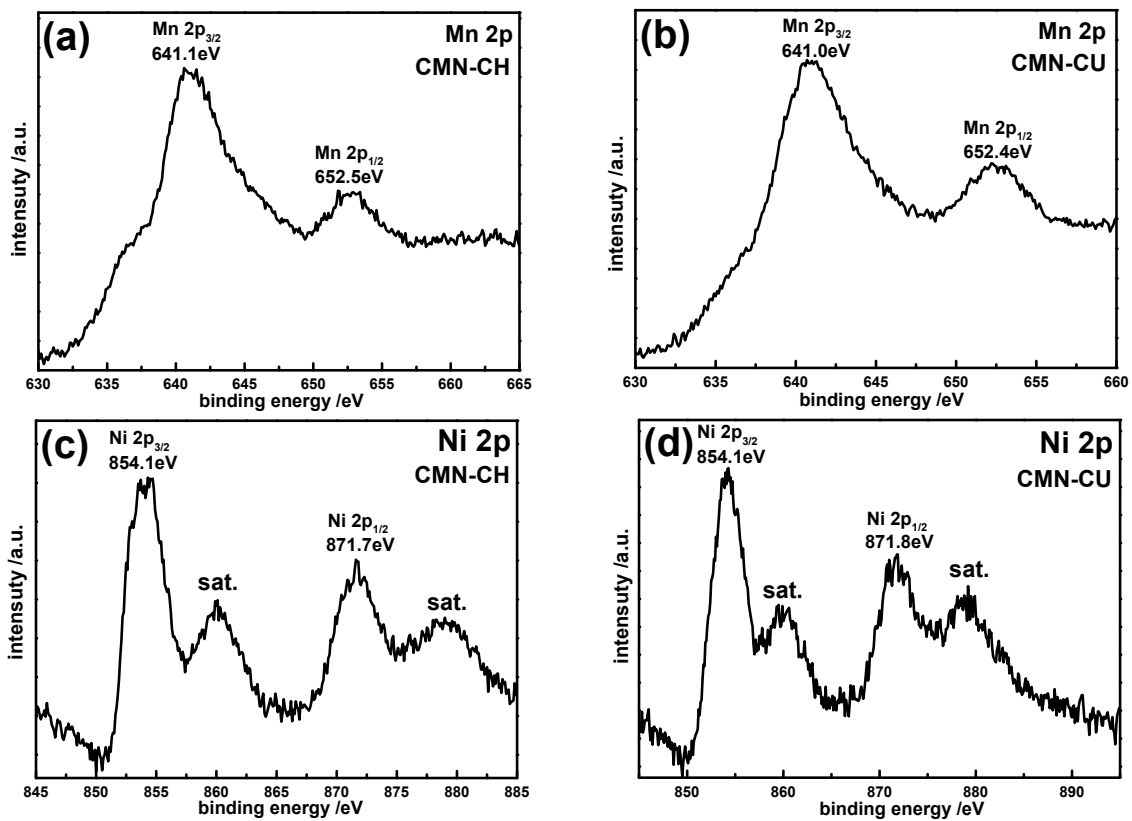

Fig. S3. XPS spectra of CMN-CH and CMN-CU.

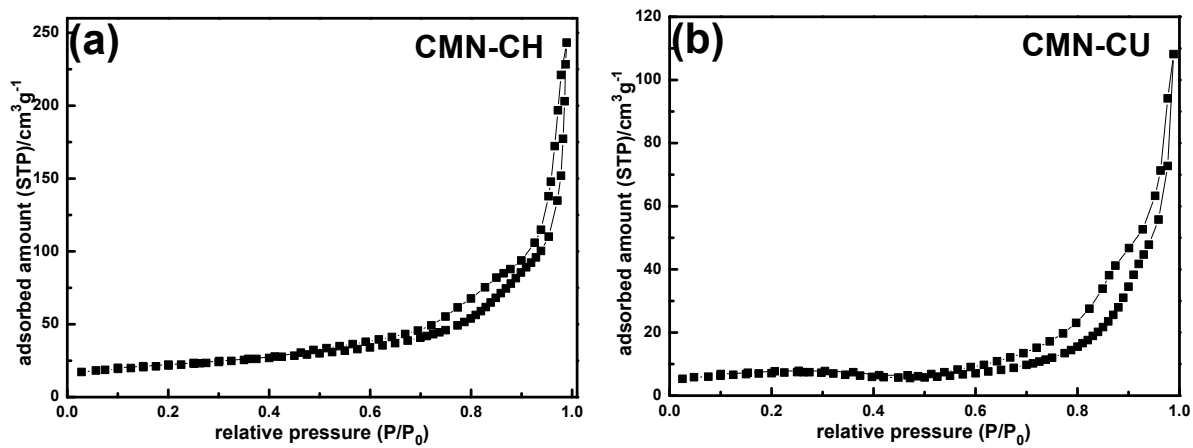

**Fig. S4.** The N<sub>2</sub> adsorption-desorption isotherms of (a) CMN-CH and (b) CMN-CU.

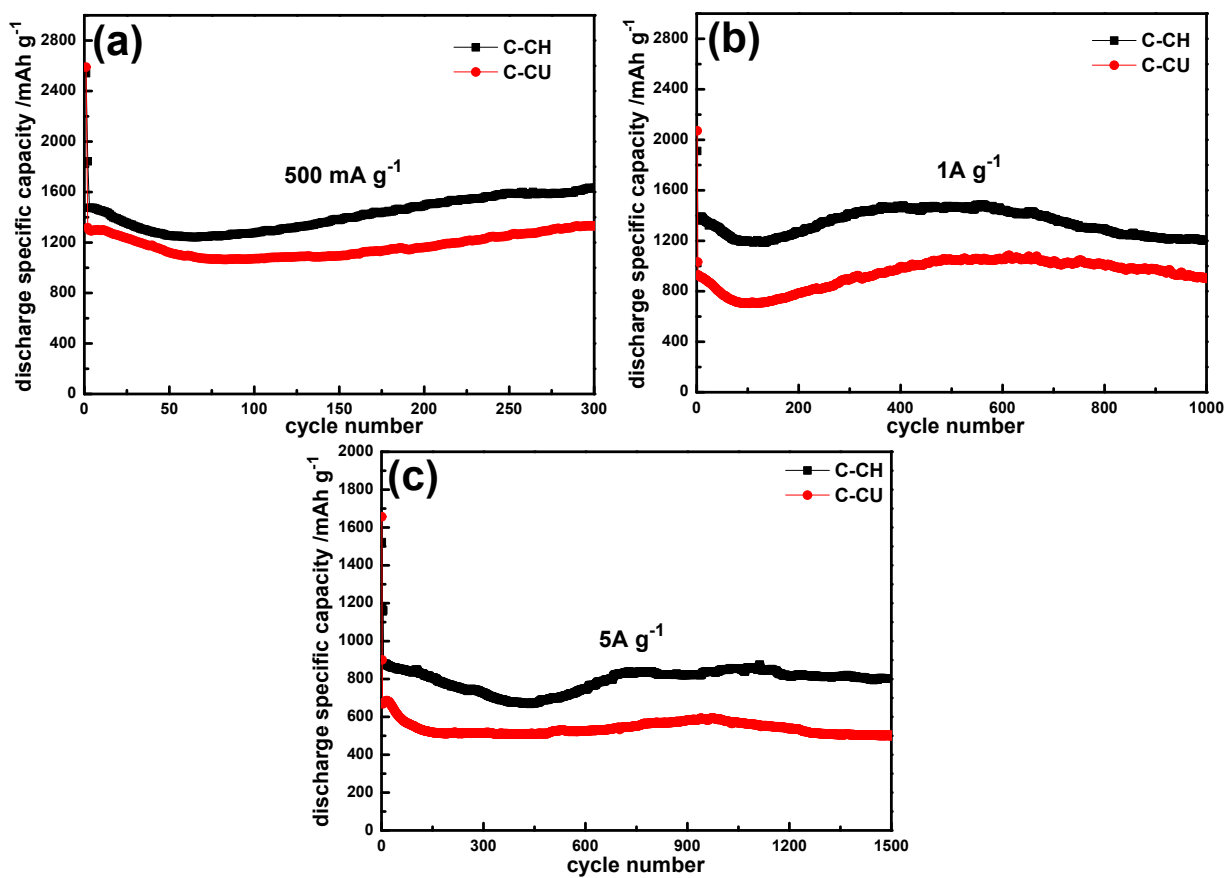

**Fig. S5.** Cycling performances of C-CH and C-CU at (a) 500 mA g<sup>-1</sup>, (b) 1 A g<sup>-1</sup> and (c) 5 A g<sup>-1</sup>. The voltage range is 0.01-3 V (vs Li/Li<sup>+</sup>).

;
